# Supplementary material
Source: MDPI journal article supplement (https://www.mdpi.com/2077-0472/6/1/9)
Supplement: s1 [file s1]

## Sheet: Results for paper
					Total	Per person per year	Per Household per year		NZ population	4403000	National Population Estimates: March 2011 quarter
			Tonnes	MSW	224167	0.0509123	0.132372			2.6	Household size
				C&I	103384	0.0234803	0.0610489
				Total	327551	0.0743927	0.193421
					Total	Per person per year	Per Household per year
			Cost USD	MSW	2.92124e+08	66.3467	172.501
				C&I	1.58012e+08	35.8873	93.3071
				Total	4.50136e+08	102.234	265.808
					Total	Per person per year	Per Household per year
			Cost NZD	MSW	3.69244e+08	83.8619	218.041
				C&I	1.99726e+08	45.3614	117.94
				Total	5.68971e+08	129.223	335.981
					Total	Per person per year	Per Household per year
			Calories	MSW	1.12083e+11	25456.2	66186
				C&I	5.1692e+10	11740.2	30524.5
				Total	1.63775e+11	37196.3	96710.5
					Total	Per person per year	Per Household per year
			Water	MSW	3.16304e+09	718.383	1867.8
			m3	C&I	1.62426e+09	368.899	959.138
				Total	4.7873e+09	1087.28	2826.93
					Total	Per person per year	Per Household per year
			Energy	MSW	19489.7	0.00442645	0.0115088
			TJ	C&I	9859.21	0.0022392	0.00582193
				Total	29348.9	0.00666566	0.0173307
					Total	Per person per year	Per Household per year				Total	Per person per year	Per Household per year
			C02-E	MSW	2347.19	0.000533089	0.00138603		C02-E	MSW	2.34719e+06	0.533089	1.38603
			Gg	C&I	1897.19	0.000430885	0.0011203		Tones	C&I	1.89719e+06	0.430885	1.1203
				Total	4244.38	0.000963974	0.00250633			Total	4.24438e+06	0.963974	2.50633
			Waste composition %	Aggregation	Organic (food waste + other organics)	Paper	Plastic	Metal	Glass	Construction and Demolition	Other	Potentially hazardous
				MSW	0.258431	0.298696	0.222084	0.0856703	0.0600677	0.0254814	0.0414214	0.00814801
				C&I	0.247265	0.193276	0.141018	0.0831789	0.0331878	0.233179	0.0473006	0.0215947
				Total	0.245475	0.263556	0.195062	0.0848398	0.0511077	0.0947141	0.0433811	0.0126303

## Sheet: Sectors Detail
		Fresh and agricultural related food waste						Processed and consumption related food waste
	C&I	Apple and pear growing waste	Kiwifruit growing waste	Other fruit growing waste	Sheep and beef cattle farming waste	Dairy cattle farming waste	Fishing waste	Meat processing waste	Poultry processing waste	Bacon, ham and smallgood manufacturing waste	Dairy product manufacturing waste	Fruit and vegetable, oil and fat, cereal manufacturing waste	Bakery, sugar and confectionery manufacturing waste	Seafood processing waste	Other food manufacturing waste	Other Organic	Paper	Plastic	Metal	Glass	Construction and Demolition	Other	Potentially hazardous	Total
	Vegetables	18.7518	18.7514	18.7548	18.7477	18.7477	18.7508	18.7476	18.7517	18.7606	18.7477	954.837	18.7498	333.188	155.106	119.565	70.8982	55.9548	20.5017	19.9996	24.5941	4.11296	12.7103	1977.73
	Pipfruit	2.52155	2.52199	2.52309	2.51557	2.51563	2.52093	2.51545	2.52262	2.53706	2.51559	43.6149	2.51923	2.51846	2.51929	10.4142	7.09593	5.54444	2.25987	2.07245	5.79746	0.992121	2.94063	113.498
	Kiwifruit	0.00384113	0.00408888	0.00490977	0.000501756	0.000535887	0.00350329	0.000440614	0.00445088	0.0125197	0.000517174	7.39716	0.0025474	0.00219053	0.00257755	0.0653387	0.143182	0.109767	0.0802839	0.0320594	0.182748	0.0438477	0.0540018	8.15101
	Other fruit and nuts	0.48903	0.489369	0.490194	0.484467	0.484513	0.488558	0.484375	0.489842	0.500868	0.484483	5.19108	0.487256	0.486672	16.5344	153.857	5.35189	3.773	1.03252	0.95473	0.917559	0.172017	0.423014	194.067
	Oil seeds	0.00346769	0.00338883	0.00404676	0.000433786	0.000469631	0.00345682	0.000453067	0.00413612	0.0138948	0.00058156	0.00233707	0.00255833	0.0025518	0.00260785	0.0502306	0.119972	0.089614	0.0505115	0.0260215	0.158657	0.0257949	0.0413978	0.606584
	Plants, flowers, seeds	60.2059	51.9839	69.2869	1.68438	12.9694	0.00227838	0.000285665	0.00285887	0.00894476	0.000365208	7.35353	0.00165761	0.00155315	0.00167309	81.4846	10.8877	8.13503	2.42648	2.39458	272.546	0.0284568	0.0346711	581.441
	Raw vegetable materials	29.7964	25.7971	50.6129	76.4727	465.907	0.00399121	0.000554316	0.00511925	0.016968	0.000692483	0.00288055	0.00317266	0.00300535	13.087	799.249	3.05757	30.2015	1.53611	1.47946	7.31627	46.1322	0.0613129	1550.74
	Sheep	0.0126316	0.0109477	0.0217335	1361.92	39.4195	0.0089377	6905.78	0.012035	0.035418	0.00143201	0.00593971	0.00655558	0.00639698	0.00651326	733.093	71.4024	49.3678	11.4188	11.2997	0.45465	0.105334	0.12849	9184.52
	Cattle	0.0116737	0.0100951	141.613	973.083	81.1594	0.00827859	7063.12	0.0112675	0.0331611	0.00135305	0.00560179	0.00617108	0.00594293	0.00612127	976.84	182.416	131.86	35.3437	35.2304	247.035	110.928	0.123379	9978.85
	Wool	0.0111826	0.00970787	0.0194155	0.00107493	0.00115769	0.00795579	0.00102891	0.0110825	0.0311831	0.00123562	0.00473888	0.00518557	0.00585973	0.00522443	213.089	213.252	213.179	106.639	106.542	0.361563	3616.37	0.101098	4469.65
	Grain and other crops	0.00566045	0.00493341	0.00961114	327.275	3.64564	0.00405224	0.000531528	0.00533438	0.01628	3.57252	405.739	0.0030095	0.00293841	480.646	335.827	12.3473	12.3065	6.17999	6.12595	0.207052	2.096	0.0582586	1596.08
	Beverage and spice crops	0.0658343	0.0552126	0.127667	0.00635913	0.00690157	0.0530739	0.00990209	0.0870274	0.184433	0.00807065	0.0271861	0.030102	0.039758	0.0326531	0.785655	1.59596	1.19189	0.712529	0.342344	2.76684	0.360693	0.540344	9.03045
	Unmanufactured tobacco	0.08043	0.0829761	0.0954389	0.0124834	0.0132411	0.0766246	0.0154057	0.110448	0.283601	0.0142961	0.0489306	0.0535613	0.0534123	0.0553296	1.35342	2.85776	2.19263	1.5829	0.634427	6.48642	0.483283	1.03034	17.6174
	Raw milk	0.00995477	0.0086388	0.0167749	0.00102115	0.00108835	0.00711674	0.000911857	0.00934547	0.027207	20559.5	0.0047108	0.00519504	0.0050167	0.00525366	0.135796	0.30059	0.229784	0.167584	0.0668226	0.369434	0.0896381	0.111058	20561.1
	Pigs	0.00737031	0.00713393	0.0128404	0.000877747	0.000937054	0.00619	559.423	0.00778089	137.348	0.000957038	0.00407682	0.00450726	0.00412552	0.0045542	91.026	0.258987	0.198032	0.143884	0.0574723	0.320849	0.0773495	0.0947693	789.009
	Poultry	0.000483349	0.000540398	0.000792264	6.26094e-05	6.44398e-05	0.000401622	5.20595e-05	36.282	7.37153	6.13532e-05	0.000255159	0.000277656	0.000266146	0.000278793	0.0111016	0.0190522	0.0144652	0.00992878	0.00433214	0.0242721	0.00556694	0.00896071	43.7548
	Deer	0.00751766	0.00698473	0.0131551	21.5151	4.7021	0.00606404	490.23	0.00762995	0.0233359	0.000943488	0.00399072	0.0044136	0.00405852	0.00445975	261.851	0.254712	0.194669	0.141052	0.0564157	0.31617	0.0757803	0.0926099	779.512
	Other livestock	-0.00474281	-0.00530535	-0.00548688	-0.000588183	-0.000605891	-0.00395814	-3.47728	-0.0050267	-0.0144359	-0.000578943	-0.00265001	-0.00292604	-0.00241651	-5.06545	-0.0800517	-0.158098	-0.122006	-0.0934683	-0.0366166	-0.193669	-0.0525931	-0.0735627	-9.40152
	Other animal products	0.00571301	0.00610201	0.00702222	7.00958	43.3947	0.00523458	0.000628679	55.9527	0.019695	0.000781516	37.5085	0.00381729	0.00350496	49.5128	14.2636	4.46559	3.09299	0.783457	0.709454	0.265321	30.3758	0.0823059	247.469
	Agriculture services	460.58	404.535	535.737	316.468	184.29	0.00141897	0.000177592	1870.83	0.00536	0.000214692	0.000908067	0.00100919	0.000953223	0.0010057	1537.11	281.189	193.712	43.7614	43.7438	11.3668	1.99171	0.0192178	5885.34
	Forestry and logging	0.00435764	0.00375401	0.00737859	0.000357467	0.00038659	0.00297538	0.000360256	0.00418854	0.0123066	0.000416119	0.00159159	0.00173454	0.00217996	0.00185741	160.144	756.891	54.1368	29.7313	27.053	5995.79	44.1179	74.2557	7142.16
	Natural gums	0.000933783	0.00099232	0.00113047	0.00012368	0.000135068	0.000894018	0.000112324	0.0011046	0.00378218	0.000144263	0.000613628	0.000673563	0.000627466	0.000673359	0.0155837	0.0357675	0.0274384	0.0203334	0.00791108	0.0429557	0.0107454	0.0129808	0.185657
	Standing timber	6.15726	5.26386	11.07	0.524304	0.580031	4.31076	0.558843	6.07092	17.0178	0.633615	2.23469	2.45423	3.21028	2.61278	66.9866	144.903	108.727	75.6501	30.7048	173.772	37.8018	50.9208	752.165
	Other forestry products	0.00110966	0.00105281	0.00140254	0.000125621	0.000137741	0.000968076	0.000122569	0.00119046	0.00402802	0.000162082	0.000633143	0.000696657	0.000742851	0.000711443	0.0145754	0.0346686	0.0259741	0.0171419	0.00739311	3.92342	0.00803227	0.0110097	4.0553
	Services to forestry	0.00287053	0.00253547	0.00498625	0.000240208	0.000263177	14.1105	0.000244193	0.00260287	0.00727311	0.00028195	0.00102171	0.00113555	0.00139044	0.00117587	224.402	521.321	363.815	129.81	91.3905	2551.69	18.9652	58.9703	3974.5
	Fish	0.00187832	0.00189772	0.00316275	0.00023137	0.000249065	207.035	0.000206068	0.00206243	0.00599359	0.000241611	0.00106431	0.00118493	3040.05	0.00119427	1.3498	1.38484	1.36953	0.696181	0.674215	0.0826543	0.0204846	0.0260586	3252.7
	Crustaceans	0.00256839	0.00221495	0.00456542	0.000245976	0.00026412	0.0017294	0.000230578	0.00241356	0.00686533	0.000257442	0.00113597	0.0012643	342.494	0.00127607	0.0328844	6.50668	12.9245	3.25718	3.23333	0.0893208	0.0215813	0.0271853	368.612
	Fishing services	0.00141757	0.00121492	0.0028266	0.000127758	0.000137224	221.264	0.000111918	0.00120481	0.00344568	0.000138625	0.00058397	0.00064497	12.1647	0.000644145	0.292507	0.310847	0.302457	0.157638	0.145494	0.0451627	0.0113412	0.0156838	234.722
	Fishing quota leases	0.00163305	0.00142665	0.00305737	0.000148695	0.000160626	291.964	0.000131251	0.0013956	0.00409173	0.000162811	0.000688621	0.000766396	0.000720231	0.000772917	5.00414	22.4673	15.4809	3.51236	3.49792	0.0528654	0.0135413	0.0182465	342.026
	Coal	0.003427	0.00301736	0.00569902	0.000326583	0.00035772	0.00242997	11.4569	0.00323326	0.00937857	37.1743	8.82955	0.00168944	0.00174737	0.00169165	23.3496	168.105	38.5614	310.504	9.50553	82.1968	46.5122	0.0340926	736.262
	Metal ores	0.00187877	0.00162722	0.00337091	0.000174086	0.000189746	0.00135355	0.000174578	0.00180829	0.00546512	0.000219283	0.000783702	0.000859013	0.00101025	0.000904718	0.0206141	0.0461041	123.463	225.037	0.00982506	278.769	0.0113798	7.35656	634.734
	Building stone	0.00213759	0.00182218	0.00411504	0.000218744	0.000233329	0.00157827	0.000192144	0.00193443	0.00601264	0.000244275	0.00101087	0.00112079	0.00109799	0.00112997	0.0285987	24.1681	0.0489342	0.0352265	0.0141824	0.0773115	3.21098	0.0232853	27.6294
	Gypsum and limestone	0.00307977	0.00261754	0.00591833	10.85	22.4059	0.00205491	0.000261765	0.00290143	0.00806076	0.000300118	0.00106438	0.00115994	0.0014931	0.0012245	26.3441	61.1019	0.0524676	0.0367964	0.0148053	133.731	0.0205061	0.0233771	254.611
	Sand, pebbles, gravel, clay	0.0016736	0.00144412	0.00289074	5.37652	6.97515	0.00115927	0.000146396	0.00155493	0.0045673	0.000172254	0.000619223	0.000672989	0.000831998	0.00071712	18.8554	361.31	4.57821	1.04885	408.638	414.723	3.9374	191.91	1417.37
	Chemical and fertilizer minerals	0.0161431	0.015869	0.0187347	0.00200231	0.00217669	0.0162037	0.00225757	0.019312	0.0663044	0.00260868	0.0105322	0.0116978	0.0118171	0.0119245	0.246276	0.533855	0.402773	0.233454	0.117691	0.740362	0.127483	0.199928	2.80941
	Salt	0.00211698	0.00181678	0.0039781	4.36653	2.43553	9.85697	0.000188155	0.0019842	117.087	0.000213369	0.000835129	0.000923272	0.00100785	81.3355	3.81161	0.0539144	0.0411298	0.029509	0.011795	6.43565	0.0157035	0.0188804	225.513
	Precious metals and stones	0.0178392	0.015792	0.0334555	0.00100076	0.00112412	0.0114651	0.00135133	0.0200345	0.0646255	0.00160321	0.00633218	0.00716194	0.00919886	0.00771291	0.230103	58.9187	117.2	29.3879	29.3175	0.675101	0.0941029	0.208053	236.23
	Services incidental to mining	0.000810168	0.000712525	0.00146472	6.89776e-05	7.53124e-05	0.000560198	6.78051e-05	0.000719995	0.00198945	8.1214e-05	0.000322944	0.000356312	0.000374165	0.000356646	23.9458	8.56838	6.85403	3.85785	3.42387	1488.25	3.85291	11.976	1550.74
	Capitalised exploration	0.145044	0.156714	0.167692	0.0188682	0.0194691	0.0874797	0.0154767	0.137908	0.265641	0.0158611	0.0619795	0.0651927	0.0481127	0.0697151	2.02465	3.04004	2.41719	1.92199	0.773686	4.5595	1.47788	2.18629	19.6764
	Crude petroleum and natural gas	0.00582201	0.00530262	0.0094841	0.000631358	0.000691551	150.174	15.1047	0.00561852	0.0179227	85.6317	66.0807	87.4218	0.00329101	60.8821	327.309	585.73	2096.13	288.567	311.756	2266.27	100.112	206.344	6647.56
	Capitalised oil and gas exploration	0.768949	0.84268	0.899495	0.100459	0.103555	0.472689	0.0830389	0.744968	1.43684	0.0852872	0.334752	0.352202	0.259617	0.376542	10.9529	16.578	13.1664	10.3798	4.20396	24.4035	7.95796	11.8275	106.331
	Meat and meat products	12.228	12.2444	12.2395	12.1504	12.1501	12.1809	98.3665	12.2138	998.601	12.1481	12.1688	15.222	16.2043	45.7564	45.7808	32.2267	29.0684	13.7859	13.0694	12.7243	2.49778	6.41619	1439.44
	Poultry products	24.9087	24.9082	24.9187	24.8968	24.8969	24.9063	24.8967	24.9079	24.9371	24.897	52.0895	24.9029	24.9031	24.903	126.636	71.1342	67.6164	34.7266	33.7463	46.7281	7.81555	24.1147	788.391
	Bacon, ham and smallgood products	0.419463	0.419536	0.419839	0.418795	0.418798	0.41917	0.418778	0.419444	645.416	0.418781	0.419032	0.419049	0.418996	0.419073	0.948462	0.299805	0.269355	0.145066	0.131886	0.381182	0.067309	0.196441	653.304
	Hides and skins	0.00234081	0.00205572	0.00432616	0.00017687	0.000195018	0.00165654	44.4978	0.00222193	0.00603862	0.000219773	0.000790583	0.000871602	0.00114973	45.769	0.022857	0.0472403	205.07	0.023253	0.0103857	0.058727	1319.34	0.0177082	1614.88
	Processed milk and cream	0.0298683	0.0271528	0.057535	0.00327166	0.00337029	0.0197986	0.00270817	0.0264398	0.0706691	530.977	0.0119056	0.0132124	0.0131068	0.0133183	86.0532	86.3869	86.2131	43.2377	42.9929	0.958485	0.25754	0.395058	877.764
	Yoghurt, buttermilk, icecream	9.11524	9.20209	9.17603	8.70332	8.70168	8.86541	8.69192	9.03992	9.29401	8.69118	8.80109	8.80018	8.77022	8.82013	32.9071	29.0428	21.6419	9.87255	6.8461	25.6314	6.2728	12.3268	269.214
	Other dairy products	41.4074	41.4269	41.4211	41.3149	41.3145	41.3513	41.3123	41.3905	41.4476	440.521	41.3368	57.6839	41.3299	59.3352	164.763	92.4771	98.2585	45.5472	44.05	49.8833	8.76347	25.6489	1541.98
	Prepared fish	5.64665	5.64714	5.64753	5.64236	5.64238	39.7352	5.64225	5.64656	5.65105	5.64227	5.64389	5.644	44.2163	5.64416	15.4849	9.6948	8.14574	3.4688	3.34167	4.85686	0.834654	2.51299	200.032
	Prepared vegetables	8.14927	8.14853	8.15379	8.14434	8.14438	8.14753	8.14434	8.14871	8.15708	8.1444	569.908	8.14603	8.14638	22.1466	28.7702	66.3374	46.6262	11.6495	11.5313	4.32785	0.733299	2.21816	862.023
	Fruit juices	2.02822	2.02771	2.03159	2.02464	2.02467	2.02698	2.02466	2.02786	2.03389	2.02469	669.971	2.0257	2.02615	2.02582	7.91075	21.5353	14.9445	3.55703	3.5129	1.06103	0.183506	0.530694	749.559
	Prepared fruit and nuts	0.0104499	0.00892652	0.0206739	0.00083527	0.00091671	0.00702205	0.000866471	0.00946545	0.024734	5.72769	0.00365436	0.00405536	0.00475151	131.851	8.86376	39.6141	27.3052	6.24855	6.17644	0.283665	0.0644528	0.0937488	226.325
	Oils and fats	0.19388	0.193441	0.196795	0.19084	0.190866	0.192819	0.190858	0.193606	0.19866	0.19089	448.498	16.1289	0.192136	43.5345	22.303	0.894564	48.9145	0.433434	0.398215	0.902515	1.1323	0.450811	585.716
	Grain products	0.00279269	0.00242497	0.00517327	0.000226263	0.000248374	0.0019106	0.000233168	0.0025264	48.0607	0.000262153	530.066	1027.12	0.00131278	96.6432	126.286	0.0593222	0.0451405	0.0327379	0.0130398	0.0732896	0.0173747	0.0226917	1828.46
	Starches	0.00436428	0.00376637	0.00867284	0.000317379	0.000349586	0.00283398	0.00034366	0.00396762	0.0105733	0.000369773	0.0013027	148.653	0.0019575	54.1518	0.0411778	8.68391	0.0646073	0.0446077	0.0186022	5.4087	0.0221084	0.0308758	217.158
	Animal feedings	16.9633	14.8178	30.9096	28.1851	141.421	80.8066	0.000201001	677.2	0.00586848	0.00022288	0.000944979	0.00105064	0.00111346	6.41202	295.587	158.03	108.896	24.634	24.6156	0.0689602	0.0166037	0.020832	1608.59
	Bakery products	59.0802	59.0789	59.0879	59.0713	59.0714	59.0772	59.0712	59.0793	59.0953	59.0713	215.963	355.123	59.0751	193.274	156.746	61.3995	49.0287	22.0796	20.5477	79.1263	13.2158	41.0004	1857.36
	Sugar	0.6222	0.621872	0.624329	0.619843	0.619863	0.621386	0.61985	0.621947	0.625959	5.08462	6.37677	1253.71	0.620839	164.799	214.841	0.441101	0.378976	0.210748	0.180835	0.729599	0.126029	0.364612	1653.46
	Confectionery	0.0373586	0.0442996	0.042217	0.00443847	0.00430731	0.0173923	0.00352685	0.0313393	0.0516461	0.00346759	0.0122518	174.219	0.00978455	0.0137738	9.89564	24.7919	17.3174	4.6051	4.30427	5.21193	1.02832	2.64578	244.295
	Macaroni and noodles	4.16436	4.18859	4.18132	4.04941	4.04895	4.09464	4.04622	4.14334	4.21425	4.04602	4.07669	4.07643	4.06807	4.082	23.305	8.58377	6.83446	4.18827	3.09287	20.3534	3.95089	10.3649	138.154
	Other food products	2.13123	2.13077	2.13413	2.12799	2.12801	2.13008	3.90871	2.13087	2.13622	87.9667	48.5473	19.0776	13.4136	503.504	898.105	54.7201	97.9486	46.9295	9.71196	32.6649	29.2529	1.93851	1864.74
	Spirits, wines, beer, tobacco	63.0121	63.0113	63.0162	63.0069	63.0069	63.0104	63.0068	63.0115	63.0211	63.0069	63.0084	63.0086	63.0091	63.0088	865.538	197.711	145.438	54.1966	50.3105	207.633	34.6182	107.636	2545.23
	Soft drinks, bottled water	27.0188	27.0181	27.0235	27.0131	27.0131	27.0171	27.013	27.0183	27.0291	27.0132	27.0152	27.0155	27.0156	95.2576	106.958	205.1	146.637	49.4645	38.9295	24.842	4.15191	12.8374	1035.4
	Natural textiles	0.0082745	0.00713048	0.0161137	0.000603623	0.000661136	0.0054986	0.000651559	0.00754739	0.0198938	0.000710425	0.00256746	0.00280482	0.00374227	0.00306454	54.0576	54.1417	54.1022	27.0756	27.0253	0.197983	1279.96	0.0587459	1496.7
	Cotton textiles	0.00401984	0.00345455	0.00814026	0.000289867	0.000319419	0.00276182	0.000316112	0.00374786	0.0100259	0.000369483	0.00130894	0.00144229	0.00190324	0.00153501	0.0380414	0.0797103	0.0597407	0.0383527	0.0173349	0.0952894	74.8256	0.0290045	75.2227
	Man-made fibres and textiles	0.0029804	0.0029296	0.00488976	0.000338576	0.00036695	0.00248499	0.000305766	0.00285258	0.00943218	0.000376178	0.00158088	0.00175595	0.00174238	0.00176424	0.042389	0.0930479	0.0710532	15.4534	0.0205725	0.114338	24.1892	0.0356988	40.0535
	Yarn and thread	0.00554212	0.00482585	0.0104423	0.000418733	0.000458221	0.00377122	0.00044117	0.00508623	0.0137833	0.000498138	0.00178828	0.00195345	0.00257763	0.00213169	20.7464	20.8042	20.7769	10.4049	10.3707	0.133716	1138.94	0.0403305	1222.27
	Woven fabrics	0.00360374	0.00312142	0.00711144	0.000272238	0.00029798	0.00243996	0.000294455	0.00333333	0.00871375	0.000319324	0.00112453	0.00123453	0.00166295	0.00134272	0.230984	5.48147	9.71132	3.38951	2.41505	22.2223	287.006	0.0251351	330.517
	Other textiles	0.29991	0.299236	0.304702	12.2034	2.94679	0.298229	0.295156	0.299534	0.307571	0.2952	0.296379	0.296539	0.297141	27.4178	68.6788	74.0625	42.5714	141.218	11.9662	158.267	409.769	0.0383444	952.429
	Carpets	0.00375337	0.00325837	0.00699329	0.000290173	0.000318095	0.00255061	0.000305208	0.00343026	0.00926115	0.000338809	0.00121748	0.00133478	0.00174661	0.00144966	58.5456	257.689	178.02	40.664	40.6399	736.995	16.6502	0.0436092	1329.28
	Twine, rope, netting	0.00353723	0.00302458	0.00705502	0.000263657	9.0112	32.3402	0.000273066	0.00311945	0.00816545	0.000303755	0.00109686	0.00122011	0.0015586	0.00126058	52.8864	66.6479	45.9177	10.3945	10.3718	73.5465	34.3537	0.0293263	335.53
	Tanned skins and leather	0.000849098	0.000748591	0.00149987	6.80372e-05	7.5171e-05	0.00063532	7.48494e-05	0.00081785	0.00231832	9.10626e-05	0.000329173	0.00036082	0.000439904	0.000384608	0.332073	0.341784	34.0556	0.171035	0.165698	3.10537	439.296	0.00696207	477.484
	Knitted fabrics	0.00587459	0.00513956	0.0120037	0.000522966	0.000570071	0.00464276	0.000559961	0.00581309	0.0168985	0.000710566	0.00251636	0.00279477	0.00330748	0.00298561	0.0672297	0.144668	0.109243	0.0626555	0.0319878	0.183049	65.2105	0.055579	65.9293
	Clothing	0.00963774	0.00842288	0.0166344	4.82397	0.000857273	0.00701928	0.000833653	0.00917467	0.0257491	0.000946887	0.00342976	0.00377101	0.00487794	0.00412007	219.345	519.497	352.464	168.381	97.2678	521.955	118.253	20.0715	2022.15
	Handbags and articles of leather	0.0195728	0.0170082	0.0393051	0.00133343	0.0014917	0.0132331	0.00169019	0.019407	0.049611	0.00174999	0.00605584	0.00677911	0.00952801	0.0073265	0.195536	0.401494	0.300039	0.181358	0.0879766	63.8294	0.0837119	0.148851	65.4224
	Footwear	0.132876	0.118061	0.234826	0.0100639	0.0111963	0.0959021	0.0113184	0.12811	0.354357	0.0129104	0.0465173	0.0513293	0.0671109	0.0557952	30.8506	109.511	77.9202	20.4708	19.7709	3.54703	0.626381	1.07783	265.105
	Wood	17.1514	15.088	0.00429285	12.3678	16.49	0.00175528	0.000258698	0.00226569	0.00638612	0.000287226	0.000906791	0.000988899	0.00122171	0.00105639	62.9814	301.238	158.07	51.9515	377.022	6938.74	0.0165023	0.0214311	7951.15
	Panels and boards	0.00288412	0.00253524	0.00502923	1.4338	1.59984	0.0020211	0.000306322	0.00259466	0.00723376	0.000340347	0.00110446	0.00122253	0.00140702	0.00123113	3.93181	62.7487	46.9151	22.0047	10.2445	2886.74	0.0215389	0.0286945	3035.69
	Veneer sheets and plywood	0.00153594	0.00151663	0.00292447	0.000234235	0.000249261	0.00128613	0.000215274	0.0016076	0.00488307	0.000246808	0.000867187	0.000955956	0.000921981	0.000964092	0.634226	2.79411	1.9288	0.455109	0.438134	26.2217	0.0166412	0.0212047	32.5283
	Builders joinery	0.00275698	0.00241158	0.00503108	0.000280152	1.47952	0.00189783	0.000283948	0.00248074	0.00676824	0.000312348	0.00100997	0.00111735	0.0013141	0.00112624	5.27774	47.0781	12.5153	3.34592	3.32548	1151.75	0.0194744	0.0235466	1224.84
	Wood containers	0.00711982	0.00617034	0.0137988	0.000689852	0.000743672	0.00482891	0.000716376	0.00646596	0.0171196	0.000770309	0.00240824	0.0026627	0.00333486	0.00274601	100.002	107.978	13.6587	40.5323	4.56	0.236566	11.2905	0.056595	278.383
	Other wood products	0.00154394	0.00134223	0.00295483	0.000153632	0.000165437	0.0010646	0.000157	0.00139151	0.0037443	0.000176369	0.000559157	0.000618737	0.00072846	0.000637042	36.4549	55.3538	64.0749	25.3679	17.5164	71.7259	4.37782	13.5997	288.487
	Pulp, paper and paperboard	73.5094	322.507	86.1983	2.20235	2.38605	0.453265	0.451137	0.454008	0.459738	0.451172	33.3799	0.452157	0.452496	0.452262	568.109	6183.36	1390.77	200.313	176.919	187.461	47.684	74.6339	9353.06
	Non metal wastes and scraps	0.00751386	0.00803934	0.00876582	0.000874811	0.000956457	0.00566063	1.32315	0.00788778	0.0202367	1.45238	0.00375923	0.0041008	0.00325803	7.10215	10.3363	0.204941	30.1803	0.119206	16.3589	12.1729	8.00254	0.102685	87.4264
	Books and stationery	0.954944	0.954604	0.957062	2.43566	2.60326	0.954114	5.49605	19.2698	0.959413	7.90578	14.64	15.9697	20.1702	17.194	603.889	2631.25	1627.45	529.402	377.109	397.99	119.278	44.888	6441.73
	Prepared printing plates	0.00424912	0.00369325	0.00879719	0.0003986	0.000435886	0.00314815	0.000396187	0.00384826	0.011859	0.000481225	0.00183932	0.0020286	0.002247	0.00210957	0.0463904	19.8866	6.16331	0.0564275	0.0222484	0.133234	0.0298259	0.0375013	26.421
	Newspapers and journals	1.82597	1.82556	1.82857	9.03934	3.82601	1.82497	3.6527	1.82569	64.8047	10.166	84.2469	55.9491	24.9834	109.491	680.597	1434.64	1232.6	438.372	281.347	272.749	141.939	126.907	4984.44
	Petroleum products	54.4584	47.453	52.3995	80.371	74.9186	271.582	20.2233	50.9366	524.762	26.2918	36.1596	241.972	63.0252	92.5874	1000.2	1300.53	990.311	610.999	169.136	3529.42	514.271	827.508	10579.5
	Industrial chemicals	0.00197093	0.00174226	0.00347318	0.00016087	0.000176063	0.00136105	1.00294	0.00178112	0.00496225	9.16982	9.19046	0.000740382	0.00092749	0.000790352	27.022	115.825	2348.44	156.861	19.8764	377.197	55.2947	121.471	3241.37
	Other chemical products	0.0640054	0.0641746	0.0643025	0.0624756	0.0624826	0.0633244	0.530567	0.0639467	0.0655259	0.565291	0.0630095	0.0630493	0.0628385	0.0631051	2.01921	18.3582	33.2706	34.4681	1.13596	48.3071	3.64861	50.1298	193.196
	Plastics	18.4802	16.4866	1.30054	13.1368	16.6996	11.7629	78.1757	161.956	553.663	165.31	261.486	289.289	21.956	615.148	143.246	266.249	823.47	463.226	64.7585	786.632	85.3152	249.21	5106.96
	Rubber	0.00424966	0.0037424	0.00772347	0.000338782	2.33457	0.00292356	2.16468	27.0335	0.0106651	0.000391544	0.00140737	10.6536	0.00199632	0.00167111	28.2288	45.6223	33.2543	114.948	9.11666	62.4397	153.894	0.0322419	489.758
	Rubber tyres	57.9859	51.0549	106.298	19.5036	21.7268	0.00556869	0.000642759	0.00748965	0.0212138	0.000731189	0.00269061	0.0029405	0.00381709	0.00323183	104.287	41.5861	33.886	92.9127	12.2668	43.9343	17.1863	0.0642224	602.741
	Paints	0.00271549	0.00238629	0.00485972	2.76698	0.000247038	0.00189959	0.000231659	0.0024892	0.00681744	0.000258525	0.000964284	0.00107117	0.00129439	0.00109235	23.0101	456.658	393.895	172.75	46.9663	1240.43	28.5151	0.0213455	2365.04
	Pharmaceutical products	0.00445097	0.00390625	0.00817147	67.779	134.854	0.00337944	0.000415165	0.00427463	0.012238	0.000504886	0.00189742	0.0020944	0.0023536	0.00216908	292.6	652.553	492.765	399.694	106.874	0.136806	54.7376	0.0399832	2202.08
	Soap and perfumes	1.17447	1.17391	1.17826	1.17014	37.7339	1.17304	1.17017	1.17421	1.18219	17.2501	1.17137	1.17151	1.17201	1.17168	112.532	483.322	376.443	75.7271	75.6285	38.1098	16.0005	2.0703	1248.9
	Fertilisers	151.984	50.5569	166.712	152.924	300.419	0.00189936	0.000233958	0.00243677	0.00684791	0.000270436	0.00111813	0.00124314	0.00128727	0.0012347	719.315	31.872	117.991	5.12278	5.10155	168.989	1.99196	2044.09	3917.08
	Pesticides	106.809	0.00266983	160.808	21.6139	15.9366	0.00202876	0.000239009	0.00275643	0.00761607	0.000262241	0.000965029	0.00105411	0.00136728	0.00116003	254.849	11.7325	8.0865	1.8482	1.82895	82.0655	0.0165854	0.0234537	665.639
	Glass and glass products	0.00280601	0.00248284	0.00486711	1.46864	1.63083	0.00202754	0.000245977	0.00259438	0.00723416	0.000280631	6.79767	0.00114248	0.00138181	24.3893	302.814	45.8998	45.3845	577.502	53.7062	888.21	12.1396	32.4487	1992.42
	Cement, lime and plaster	0.0033104	0.00289389	0.00605336	3.30286	3.65622	0.00228822	0.000273826	0.00300585	0.0082577	0.000310894	0.00113521	0.0012542	0.00155393	0.00130733	9.02467	912.554	27.9269	6.33205	32.2589	655.423	7.1621	0.0258304	1657.7
	Articles of concrete and stone	0.00295248	0.00258764	0.00523724	0.000247518	0.000270504	0.00207429	0.000251758	0.00269367	0.00751061	0.000290127	0.00105505	0.00116382	0.00141653	0.00122192	16.2957	809.349	58.4448	30.5621	13.393	3359.24	0.0179408	0.0236344	4287.35
	Other mineral products	0.00238978	0.00208433	0.0048437	0.000230979	0.000252595	0.00180654	0.000222914	0.00219986	0.00674213	0.000276306	0.0010682	0.0011807	0.00127266	0.00122908	0.926702	4.10598	2.83268	0.660653	0.642519	128.818	0.0159724	0.0222331	138.05
	Metal wastes	0.0027844	0.00240553	0.00557004	0.000205668	0.000225425	0.00181836	0.00021783	0.00250056	0.0065324	0.000236146	0.000837135	0.00091878	0.00123324	0.000997012	0.0260129	0.0543633	0.0409651	280.608	0.0117524	0.0656724	0.0142287	0.0197076	280.868
	Iron and steel	1.21011	1.20968	1.21286	1.20699	1.20701	1.20904	22.1325	22.0669	58.5108	25.2708	24.0909	17.9665	44.9375	28.2106	125.546	339.024	245.03	4570.35	91.2985	1050.47	119.588	69.5897	6861.33
	Other metals	-0.0269267	-0.0286799	-0.0327692	-0.00332541	-0.00359077	-0.0247455	-0.00301026	-0.0313832	-0.0905791	-0.00354672	-0.0161162	-0.0179409	-0.0149508	-0.0180959	-0.447231	-0.935183	-0.730232	-3.05768	-0.220257	-1.20395	-0.304077	-0.369861	-7.58413
	Structural metal products	0.843288	0.842794	0.846549	0.839583	0.839609	0.84206	22.9599	26.9663	0.849578	25.8673	19.5443	21.2852	39.9313	23.1857	84.5172	314.497	260.915	3480.3	98.296	2712.81	274.415	149.394	7560.78
	Tanks, reservoirs and containers	0.0221789	0.0190843	0.044791	0.00170078	0.0018656	0.0155696	0.00185291	0.0211372	0.0545659	0.00204959	0.00772901	0.00859135	0.0104436	0.00893614	30.6008	31.7864	31.2963	15.4657	15.3455	0.509943	149.988	0.165821	275.379
	Steam generators	0.00412066	0.0040169	0.00794032	0.000426144	0.000466943	0.00373892	0.000454357	0.00433816	0.0141571	0.00057114	0.00224901	0.00247996	0.00264909	0.00256397	0.121834	0.418212	0.296457	0.0986583	0.0729895	15.4017	0.0344304	0.0466345	16.5411
	Other fabricated metal products	21.7562	19.0067	0.169316	31.664	42.0907	0.165838	6.71118	0.166523	0.171447	5.69795	207.721	8.01982	10.3826	25.7509	1701.61	578.701	624.596	1004.87	137.346	758.309	46.8842	49.9883	5281.78
	Engines	0.00227084	0.00228196	0.00262072	0.00030077	0.000324914	0.00205508	0.000281861	0.00272056	0.00837685	0.000335088	0.00142124	0.00157149	0.00142386	0.00157422	0.0785259	0.270533	0.192134	0.0720945	0.0472024	0.102895	0.0272845	0.0290922	0.84732
	Motor vehicles and parts	0.462298	0.461239	0.468232	8.42625	9.41409	38.7839	4.68292	0.461673	0.47423	5.17779	18.567	20.3612	0.458201	22.3253	406.3	1167.71	847.09	549.983	200.559	754.918	588.106	88.2222	4733.41
	Coachwork	0.00210703	0.00180552	0.00418932	0.000195722	0.00021123	0.0014997	0.000181149	0.00187492	0.00548249	0.000222655	0.000926912	0.00103152	6.49037	0.00103623	0.0524307	0.181277	0.12847	117.989	0.0315794	0.0589867	0.0162196	0.0192298	124.988
	Ships	0.807142	0.861021	0.983641	0.100745	0.108793	0.741406	0.0896147	0.935911	2.72458	0.106665	0.483679	0.538461	0.448556	0.542526	13.7222	27.726	21.4948	16.3277	6.39541	34.6578	9.43522	12.0729	151.305
	Pleasure and sporting boats	1.80928	1.92853	2.20442	0.226194	0.243928	1.65833	0.200183	2.09771	6.06988	0.23873	1.08208	1.20368	1.00467	1.21364	29.8159	61.4124	47.628	102.983	14.1498	76.995	20.8338	26.2286	401.228
	Other transport equipment	0.644121	0.689019	0.787982	0.0805982	0.0867579	0.59562	0.0718486	0.756095	2.1881	0.0856437	0.388869	0.432661	0.360638	0.436363	10.2303	21.896	16.9786	23.242	5.01494	27.1255	7.34298	8.91519	128.35
	Aircraft and parts	0.00810127	0.00803209	0.0117772	0.0009445	0.00102154	0.00712295	0.000910681	0.00927774	0.0270006	0.00109113	0.00466256	0.00519371	0.00473009	0.00515675	5.4179	24.1045	16.6268	59.0894	3.7679	0.331326	59.1301	0.103045	168.666
	General industrial machinery	0.299151	0.298412	0.303738	0.293962	0.294008	0.297383	6.17526	0.298627	0.307341	3.57759	0.295457	0.295665	0.296157	0.295708	33.5298	100.625	132.031	430.851	18.0178	499.636	32.1142	3.32305	1263.46
	Machinery for textile production	0.00231134	0.00231291	0.00265908	0.000301573	0.000326646	0.00210694	0.000274668	0.00263926	0.00835931	0.000330126	0.00142763	0.0015872	0.00143343	0.00159797	0.0804104	0.280101	0.1985	0.0712469	0.0487233	0.093648	0.0254402	0.0290436	0.854781
	Agricultural and forestry equipment	0.00477356	0.00419791	0.0083818	17.3802	47.0863	0.00344664	0.00041598	0.00431961	0.0123488	0.000502275	0.00205413	0.00227841	0.00236756	0.00229871	32.4849	1.5958	1.44476	379.307	0.629506	6.78331	0.0380736	0.0477415	486.845
	Machinery for mining	0.0123456	0.0105907	0.0238461	0.00102522	0.0011093	0.00853988	0.00104614	0.0113406	0.0298843	0.00119076	0.00475288	0.00527901	0.00572855	0.00533435	0.309042	1.09957	0.775751	0.259052	0.188353	196.696	0.0855601	0.0980297	199.633
	Machinery for food production	0.0401729	0.0349001	0.0756832	0.00311064	0.00343634	0.0280722	0.00337639	0.0379737	0.0997067	0.00362559	0.0129012	0.0141974	0.019268	0.0156605	23.6745	105.584	72.7854	16.6672	16.4745	0.900048	0.230525	0.297038	237.005
	Domestic appliances	0.00522405	0.00457795	0.00954517	0.000406751	0.000441113	0.00336952	0.000390311	0.00439756	0.0129665	0.000445546	0.00181884	0.00202354	0.00223485	0.00200281	19.4454	19.2321	15.0398	185.826	5.53693	1308.47	2.12542	6.54546	1562.28
	Office equipment	5.03758	5.36365	6.13176	0.628509	0.678262	4.61318	0.561959	5.84715	16.9096	0.663659	3.00901	3.34752	2.79729	3.37669	84.5477	171.571	133.049	101.224	39.5884	308.822	58.3876	74.1886	1030.34
	Computers and parts	2.45724	2.5776	2.93771	0.306234	0.33011	2.19577	0.272191	2.80086	8.0833	0.319186	1.43347	1.59539	1.33119	1.61091	38.182	81.8984	63.4014	48.0304	18.6673	103.616	27.2139	32.8702	442.131
	Electric equipment	4.68464	4.99994	5.71381	0.578059	0.624496	4.3161	0.529173	5.47423	15.8339	0.619831	2.81266	3.13252	2.60689	3.16007	84.6169	191.523	146.252	163.177	42.1556	296.982	53.6657	66.822	1100.28
	Audio and video records and tapes	0.00944237	0.00942927	0.0109323	0.00112725	0.00122759	0.00858652	0.00115419	0.0101722	0.0345187	0.00133623	0.00569575	0.00632216	0.00600212	0.0062981	0.135534	0.30569	0.232074	0.162822	0.0674324	0.410571	0.0833226	0.113488	1.62318
	Watches and clocks	0.0838901	0.0720532	0.168324	0.00631855	0.00692288	0.0567749	0.00749526	0.0810524	0.200087	0.00754039	0.0258738	0.0283672	0.0387756	0.0311778	10.8162	11.6877	11.2722	5.85167	5.36866	2.20998	0.413021	0.581089	49.0152
	Medical equipment	0.0070765	0.00631213	0.0134062	0.000715511	0.000774375	0.00530689	0.000676004	0.00633699	0.019555	0.000809501	0.00335412	0.00372491	0.00371085	0.00374804	29.3907	132.065	90.9912	66.2601	20.5555	0.245997	0.0508752	0.0676246	339.703
	Photographic and scientific equipment	0.00660398	0.00579969	0.0118878	0.000643593	0.00069559	0.00480062	0.000610381	0.00610567	0.0176804	0.000726077	0.00302856	0.0033413	0.00331334	0.00340918	42.2086	181.236	125.621	120.309	29.0421	0.214928	0.0449195	0.0609749	498.806
	Furniture	0.00738634	0.00645574	0.0128181	0.000700402	0.000721151	0.00519576	0.000634009	0.00676766	0.0190523	0.000714633	0.00255019	0.00279872	0.00361295	0.00303773	91.5709	408.499	317.752	442.333	68.2977	688.114	33.0275	0.0863095	2049.75
	Jewellery	0.00615474	0.00543687	0.0117192	0.000420656	0.000471561	0.00427781	0.000523178	0.00633927	0.0172548	0.000569264	0.0019994	0.00224926	0.00310447	0.00249062	0.0728285	27.7072	55.2377	13.8413	13.8146	0.179761	0.0303559	0.0598556	111.007
	Musical instruments	0.099533	0.084187	0.197932	0.0088521	0.00956307	0.069095	0.0107792	0.10002	0.226821	0.0105723	0.0373997	0.0414745	0.0457777	0.043392	0.9887	2.05665	1.55876	0.98353	0.450887	3.95757	0.555919	0.755179	12.2926
	Sports goods	0.00646261	0.00557114	0.0127105	0.000490565	0.000539806	31.0317	0.000545258	0.00609207	0.0154328	0.000579766	0.00201669	0.00221513	0.00303245	0.00243167	23.4776	105.501	72.6863	16.4526	16.419	0.157272	0.0309017	0.0454852	265.86
	Games and toys	0.123368	0.106052	0.247886	0.00930835	0.0101852	0.0829517	0.0126862	0.126326	0.295075	0.0116344	0.0392162	0.0432621	0.0580827	0.0458887	1.2182	2.49469	1.87485	1.22832	0.535562	4.02824	0.610492	0.855622	14.0579
	Prefabricated buildings	0.00767045	0.00676964	0.013566	0.000599776	0.000660626	0.00545943	0.000637779	0.00715555	0.0198621	0.000720887	0.00262082	0.0028816	0.00376029	0.00315083	0.192861	0.678156	0.47732	8.45605	0.115626	619.671	0.0436582	0.059383	629.769
	Other manufactured articles	15.5544	15.5535	15.5605	15.5478	15.5478	15.5525	15.5478	15.5541	15.5662	15.5479	15.5499	15.5502	15.5508	15.5504	69.5972	215.305	141.816	102.779	32.5271	22.3077	12.8338	3.03426	817.934
	Services incidental to manufacturing	0.353143	0.352486	0.357411	0.34812	0.348166	0.351461	77.6243	0.352637	96.6033	10.2046	63.522	70.0223	36.6085	30.2636	458.086	3504.59	957.651	1753.46	311.214	1635.98	344.816	84.2093	9437.32
	Electricity	195.336	174.499	235.752	45.1152	109.713	83.7988	118.267	154.613	218.222	111.627	157.864	131.324	163.617	129.692	941.285	2739.79	1708.95	2028.26	569.748	8169.27	302.287	241.615	18730.6
	Services to electricity distribution	0.00397196	0.00350115	0.00680619	0.000347596	0.0003806	0.00285472	0.00034151	0.00352873	0.0105277	0.000413535	0.00160091	0.00178843	0.00194961	0.00178223	0.0459685	0.0962499	0.0741261	0.0537322	0.021681	2962.41	0.0306246	0.0385464	2962.81
	Water	0.100977	0.100793	0.102119	0.0995019	0.0995154	15.9949	20.3502	0.100803	0.103499	8.82673	0.100002	8.53676	0.100145	4.64141	61.4596	169.676	117.289	30.5105	26.8375	1879.68	8.53612	4.80951	2358.06
	Pre-erection work	0.00413772	0.00367283	0.00694155	0.000553775	0.000588097	0.00303046	0.00057962	0.00386594	0.0103008	0.000620356	0.0016149	0.0017498	0.00217896	0.00186949	3.28378	14.6621	10.1061	9.00144	2.28626	1252.58	0.0235092	0.0382924	1292.02
	Residential building construction	0.0194735	0.0229029	0.0294383	0.00320839	0.00314359	0.0130592	0.00275798	0.0166665	0.0449143	0.0027287	0.00727846	0.00760226	0.00942319	0.00810244	20.9136	93.4506	64.4098	14.6925	14.5676	7167.85	96.3656	0.228654	7472.67
	Non-residential building construction	0.00386953	0.00343322	0.00648354	0.000516809	0.000548144	73.6826	0.000546656	0.00367806	0.00981043	0.000582592	0.00152178	0.00165379	0.00206022	0.00176683	596.946	2627.28	1833.4	508.767	408.693	1044.77	99.8393	173.777	7367.2
	Civil engineering	0.00444415	0.00393935	0.00749855	0.000600359	0.000635721	0.00326484	0.000629185	0.00421295	0.011305	0.000673565	0.00175706	0.00190213	0.00234465	0.00203297	321.653	1217.01	807.159	268.258	187.552	7362.08	16.9879	33.7735	10214.5
	Prefabricated constructions	0.00126346	0.00137259	0.00146997	0.000182603	0.000187672	0.000792467	0.000154498	0.00122304	0.00277081	0.000158448	0.00056345	0.00059216	0.000462722	0.000631109	0.147927	0.612432	0.424734	0.107961	0.0979077	9.43741	0.0129118	0.0193032	10.8724
	Other installation work	14.0107	12.4051	23.7429	15.6787	20.9512	0.00155925	0.00030267	0.00196725	0.0052899	0.000327969	0.000860658	0.00094007	0.00112008	0.000982673	65.7844	71.6709	45.325	10.2503	10.2368	2924.96	0.0118872	0.0170146	3215.06
	Plumbing	0.00264436	0.0023549	0.00440839	7.67793	10.0141	0.00193478	0.000365829	0.00246816	0.00664041	0.000393642	0.0010351	0.00112247	0.00139013	0.00119771	17.6384	1.60227	1.10731	1.38616	0.252658	2155.77	0.0138619	0.0215823	2195.51
	Electrical installation work	0.00340435	0.00302697	0.00568715	0.000460964	0.000488416	0.00249012	0.000474237	0.00316172	0.00862816	0.000512671	0.00134761	0.00145901	0.00178697	0.00155046	34.8626	125.251	92.1432	179.292	21.026	6003.17	0.0185817	0.0278586	6455.83
	Fencing	0.00277995	0.00246019	0.00482106	0.000374389	0.000395071	0.0019726	0.000380629	0.00249891	0.00657598	0.000418521	0.00110239	0.00120018	0.00140268	0.00124769	0.519708	2.26926	1.56713	0.374199	0.35655	260.578	0.0154952	0.0220995	265.73
	Building completion work	0.00440378	0.00389802	0.00742435	0.000605769	0.000640316	0.00319171	0.000622747	0.00407181	0.010865	0.000674677	0.00177308	0.00194303	0.00228905	0.002025	366.587	1746.18	1130.19	356.51	256.012	2342.2	0.0259334	0.0403772	6197.8
	Land and land improvements	0.366773	0.315637	0.709458	0.0298891	0.0324384	0.250758	0.0310793	0.334242	0.888674	0.0358769	0.137523	0.152583	0.168658	0.153257	29.7303	124.283	86.2391	22.6675	19.884	10.7193	111.92	3.26404	412.314
	Wholesale trade	143.368	126.736	171.734	123.126	164.06	174.212	130.078	168.169	881.434	106.833	510.936	382.389	915.058	377.953	2452.5	4208.87	4686.02	4220.34	662.504	5838.12	1712.61	854.396	29011.5
	Retail trade	125.844	109.77	114.898	46.979	77.2684	135.92	72.4184	90.9798	1420.88	34.5391	279.582	273.752	75.1989	134.374	1075.59	1418.34	1077.52	1213.51	271.935	1981.62	726.446	244.567	11001.9
	Repair services to machinery and equipment	71.2777	62.2287	97.8252	79.3663	110.15	690.024	4.31294	16.7514	45.289	25.027	12.1069	19.7974	17.2077	14.404	1534.97	2901.09	1991.7	710.558	458.552	2908.07	1083.55	446.342	13300.6
	Accommodation	0.31113	0.310409	0.315517	0.305572	0.305617	0.309293	0.305606	0.310769	0.320826	0.305665	0.307163	0.307361	0.308019	0.307585	148.264	474.836	343.423	112.339	72.7956	231.559	24.7328	3.64056	1415.92
	Meal services	0.00788624	0.00856943	0.0137042	0.000964476	0.000993936	0.00537398	0.000797394	0.00731337	0.0195897	0.000823111	0.00323812	0.0034066	0.0037952	0.00364074	209.807	943.814	650.2	146.916	146.831	0.267606	11.6177	0.115048	2109.65
	Takeaways	0.0400089	0.0340886	0.0733934	0.0028873	0.00317622	0.0276767	0.00335923	0.0390678	0.100128	0.00355982	0.0129248	0.0142384	0.019578	0.0159047	219.537	986.924	679.93	153.921	153.574	1.08501	13.9894	0.308935	2209.66
	Beverage services	0.659051	0.565546	1.15812	0.0633342	0.0653046	0.448989	0.056629	0.612713	1.63342	0.0615233	0.21566	0.237951	0.319273	0.261206	156.152	681.381	470.456	113.646	107.009	19.9757	5.07158	7.75085	1567.8
	Road passenger transport	0.422927	0.42216	0.427179	0.417601	0.417653	0.42114	0.417615	0.42242	0.432414	0.417692	0.419171	0.419402	0.419972	0.419541	218.252	925.048	642.159	149.366	149.323	323.637	100.595	0.0535663	2514.33
	Road freight transport	113.467	99.0726	146.091	63.9154	33.4385	80.0868	422.88	203.912	224.901	94.8377	208.83	281.949	483.228	353.46	1004.01	1444.42	1500.9	1088.3	320.949	2976.3	1932.26	319.642	13396.8
	Supporting services for road transport	0.00646859	0.00558799	0.0118209	0.000540666	3.6351	0.00442278	0.000552012	0.00575733	0.016323	0.000653892	0.00251917	0.00280383	0.00307292	0.00282921	5.34016	23.8462	16.4398	3.77153	3.72027	80.9114	143.56	0.0645498	281.352
	Sea, water and rail services	0.0042496	0.00373023	0.00731165	4.1594	2.31837	145.486	97.7361	54.7301	79.9371	22.999	51.3139	66.9891	114.884	86.3518	157.433	331.05	340.365	238.035	86.6191	1355.89	459.989	17.432	3713.74
	Air transport, other transport and storage services	44.0806	38.8254	74.6724	19.7343	11.8226	359.922	292.983	398.109	119.519	61.1018	122.917	166.849	1041.85	433.251	1191.43	2936.31	2504.47	1324.37	743.445	3048.01	3517.51	523.481	18974.7
	Communication services	111.654	97.5235	144.95	63.9623	46.1378	117.518	51.289	103.244	76.5134	28.0601	70.5025	86.6396	121.721	82.8808	2190.2	6596.67	4709.71	1730.58	1080.26	2415.17	906.396	323.871	21155.5
	Finance	237.493	146.832	295.264	156.202	208.77	85.5385	19.7961	67.8547	63.3846	46.2178	67.1597	47.1071	37.1185	41.2864	3044.53	7118.78	5148.08	1840.99	1175.7	2010.23	363.961	191.111	22413.4
	Life insurance	0.0313887	0.0273664	0.0551095	0.00272733	0.0029196	0.0221926	0.00274295	0.028729	0.0807844	0.00301478	0.0118358	0.013098	0.0152439	0.0133147	0.375195	0.736539	0.555271	0.45449	0.161352	1305.03	0.215855	0.339865	1308.17
	Superannuation services	0.0335348	0.0294469	0.0586175	0.00337943	0.00348066	0.0234032	0.00287657	0.0299584	0.0843446	0.00320066	0.0126735	0.013944	0.0160768	0.0141755	0.432481	0.823461	0.627072	0.516584	0.183315	459.662	0.269263	0.413247	463.256
	Health insurance	0.00512612	0.00513508	0.00904459	0.000613969	0.000632289	0.00347938	0.000508669	0.00457625	0.0131116	0.000526081	0.0022273	0.00246225	0.00236975	0.00248225	107.825	0.145532	0.11151	0.0917087	0.0329074	56.3213	19.1879	0.0744756	183.842
	General insurance	76.2547	67.0367	99.7011	36.8648	10.2168	53.967	7.74508	0.472195	0.47676	12.0179	13.3623	14.5922	27.532	15.8211	415.081	1044.58	756.421	379.48	175.312	686.362	133.315	64.9743	4091.58
	Services to finance and insurance	0.00083295	0.000736488	0.00146409	8.36129e-05	8.61032e-05	0.000590988	7.25192e-05	0.000747969	0.0021645	8.77599e-05	0.000368654	0.00040737	0.000409928	0.000408416	328.404	1477.79	1018.03	229.889	229.88	2.72194	0.00686352	0.0104201	3286.74
	Leased commercial property services	143.037	126.599	165.733	76.5322	142.873	41.6663	17.0342	30.658	68.4776	76.6347	79.54	94.4005	95.9673	119.771	2089.84	6452.21	4682.81	1928.56	1141.05	1590.5	919.808	217.871	20301.6
	Leased residential property services	0.104662	0.124102	0.118269	0.0124641	0.0120967	0.0504758	0.00991094	0.0878042	0.153518	0.00974495	0.0357342	0.0375989	0.0276669	0.0401839	432.002	1940.4	1336.9	302.674	302.013	999.277	34.4469	1.27166	5349.81
	Other real estate services	0.00178787	0.00211887	0.00308632	0.000228124	0.000234952	0.00122676	0.000189323	0.00171071	0.00445024	0.000195338	0.000768554	0.000808594	0.000841397	0.000864214	467.948	2105.69	1450.59	327.572	327.556	131.782	9.85637	0.0273753	4821.04
	Owner - occupied dwellings	178.77	211.984	202.018	21.2391	20.6115	83.2264	16.8768	149.966	247.139	16.5932	58.6276	58.28	46.8214	65.911	2014.98	2969.6	2340.89	1799.44	742.655	4367.77	1493.18	1896.26	19002.8
	Equipment hire	60.4751	53.4777	70.628	13.854	13.6677	29.0725	6.79962	74.4728	0.809769	4.243	28.2888	15.8627	125.333	17.1314	542.336	1603	1174.03	421.51	263.311	1045.95	382.688	91.1532	6038.1
	Computer software and services	1.09188	1.0914	1.09499	1.08815	1.08819	1.0907	27.2354	1.09155	74.5387	18.5255	10.8683	140.486	14.7918	47.5155	778.918	3043.81	2092.29	777.752	487.988	554.578	93.4962	146.647	8317.08
	Legal services	17.9231	15.8863	30.6099	13.6914	9.46639	36.7457	7.32991	0.97203	0.97609	8.32246	6.79643	20.0986	17.1002	14.7559	551.489	1639.32	1168.83	386.782	271.823	769.376	67.9155	56.2197	5112.43
	Accounting services	94.8569	83.5795	111.291	61.2179	40.6802	32.3032	5.72187	1.40832	1.41201	3.9471	11.5904	18.1858	15.1601	13.164	660.729	1223.21	862.364	324.883	207.391	587.27	136.858	44.0103	4541.23
	Taxation services	0.00263235	0.0028874	0.00476269	0.000345131	0.000355478	0.00186475	0.000286152	0.0025753	0.00686538	0.000294701	0.00122269	0.00136032	0.0011614	0.00136993	0.0416938	0.0750652	0.057962	0.0437321	0.0173951	77.8564	0.0274884	0.0418257	78.1895
	Architectural and engineering services	58.4542	51.6821	68.1379	34.9307	21.3376	82.1573	2.17037	245.63	0.733801	14.051	7.35692	7.99809	9.89335	24.2418	534.351	1450.72	936.245	727.657	225.891	3374.21	44.5152	50.197	7972.56
	Advertising and marketing	6.33864	6.33824	6.34115	6.33555	6.33558	6.33766	15.2892	27.9296	191.06	35.145	251.082	167.119	108.312	267.651	1391.47	3100.83	2859.85	1067.75	651.146	646.248	408.907	325.342	11553.2
	Management consultancy	19.6588	17.5781	32.8671	18.0347	4.74874	65.3898	14.1297	83.2746	1.72881	43.1338	57.7232	63.1565	53.5352	111.781	1438.18	5114.35	3610.93	1442.11	904.684	1321.96	309.102	251.014	14979.1
	Research and development	1.82374	1.93667	2.21106	0.226608	0.245042	1.66321	0.204878	2.11422	6.09509	0.240208	1.08331	1.20659	1.00978	1.21737	38.7489	97.054	72.499	44.6229	20.0315	94.9183	20.9326	26.4059	436.491
	Placement and supply of personnel	1.19196	1.19162	1.19414	1.18948	1.18949	1.19113	1.18947	1.19169	1.19605	9.24313	7.47895	8.06627	1.19053	23.549	303.891	574.357	460.852	201.199	87.9636	219.378	15.7798	11.7629	1935.44
	Investigation and security services	0.0024097	0.00211416	0.00437753	1.23154	0.000222016	0.00166741	0.000204004	0.00215461	0.00592771	4.21797	0.000932012	0.00102881	0.00112774	0.00103084	96.4826	421.778	293.422	117.605	63.6691	267.387	12.4986	0.0227959	1278.34
	Cleaning	1.11378	1.11352	1.11535	1.11186	1.11188	1.11316	9.88473	27.3036	38.1487	6.2059	6.11616	12.0595	8.10225	7.03815	181.171	757.661	537.581	212.568	132.806	112.962	43.9477	24.0974	2124.33
	Photographic services	0.00474982	0.00408943	0.00923425	0.000486976	0.000501931	0.00311704	0.000401723	0.00419112	0.0112368	0.000416321	0.00162511	0.00170952	0.00212033	0.00182736	12.3541	83.2378	38.1964	8.66676	8.63095	0.12921	1.38044	0.0582151	152.699
	Other business services	32.2082	28.4224	55.527	8.44928	6.61187	122.379	2.41286	1.19098	39.2117	5.38487	64.6279	36.032	128.011	51.0628	612.919	810.123	751.219	253.367	142.772	632.363	186.908	13.7971	3985
	Central government administration services	1.06203	1.07149	1.06865	109.657	85.459	231.91	13.4811	1.05383	1.08149	15.0317	1.02783	61.8099	1.02447	1.02991	839.86	2269.58	1514.89	416.93	346.441	292.48	105.893	276.822	6588.66
	Public order, safety and defence	15.5089	18.3903	17.5257	1.84256	1.78811	7.22015	1.46412	13.01	21.4401	1.43951	5.08613	5.05597	4.0619	5.71798	174.806	257.622	203.08	156.107	64.4277	1883.15	551.865	164.507	3575.11
	Local government administration services	6.71478	7.96234	7.58801	0.797763	0.774189	3.12607	0.633911	5.63287	9.28279	0.623258	2.20211	2.18905	1.75866	2.47568	87.9147	166.577	125.84	76.1497	36.456	3849.27	235.434	71.2255	4700.63
	Preschool education	0.100117	0.0937113	0.138896	0.0512172	0.0516789	0.0847633	0.051405	0.0956585	0.182274	0.0519055	0.0657442	0.0677856	0.0728932	0.0688572	0.855972	1.35397	1.01619	169.022	0.3011	233.649	0.380028	0.598749	408.353
	Primary education	0.690021	0.633453	1.01606	0.314979	0.317068	0.569926	0.317436	0.67045	1.35179	0.320815	0.421428	0.435099	0.482682	0.44937	6.19689	10.0562	7.54555	1091.86	2.24119	1397.34	2.94178	4.69274	2530.87
	Secondary education	0.0909619	0.0955769	0.133614	0.0441791	0.0443567	0.0750808	0.0431692	0.0880794	0.173849	0.0433367	0.0580921	0.0591224	0.0639874	0.0605527	175.648	787.648	542.711	214.048	122.633	120.378	0.50698	0.792242	1965.44
	Higher education	0.0269781	0.0289145	0.037973	0.0134227	0.0134238	0.0224053	0.0130781	0.0259276	0.0517913	0.0131361	0.0174158	0.0177151	0.0191667	0.0181305	294.589	1133.13	780.635	222.036	176.297	58.8551	4.97243	0.231378	2671.07
	Other education services	0.00400237	0.00374219	0.00567119	0.00194651	0.00196438	0.00336292	1.18552	0.00383949	0.00759125	0.00197833	0.00255002	0.00262345	0.00285398	0.00269501	243.241	1092.47	777.677	177.938	170.142	310.927	39.2167	48.9037	2861.75
	Hospital and nursing care	4.31713	5.11922	4.87855	0.512905	0.497749	2.00984	0.40756	3.62154	5.96818	0.400711	1.4158	1.40741	1.13069	1.59169	526.816	2221.13	1537.44	575.77	352.513	726.066	87.4716	45.793	6106.27
	Medical, dental and other health services	0.0125365	0.0132236	0.0204853	0.00254691	0.00251178	0.00947808	0.00236358	0.0121165	0.030387	0.00243524	0.0052582	0.00566885	0.00697741	0.00608241	362.539	1630.9	1123.54	265.119	253.726	36.1006	0.972955	0.119691	3673.15
	Vet services	0.00239021	0.00215354	0.00393378	7.73221	24.4129	0.00181871	0.00050157	0.00223388	0.00547759	0.00052193	0.00118493	0.00128152	0.0013257	0.00129594	60.6581	229.062	157.803	37.4325	35.6372	6.24199	0.178185	0.0188579	559.201
	Accommodation for the aged	0.0641196	0.0567381	0.104132	0.0127967	0.0132517	0.0490972	0.0132923	0.0614948	0.150285	0.0135503	0.027393	0.0293458	0.0363201	0.0316265	75.9067	339.048	233.716	115.29	52.9002	205.9	6.33664	0.526431	1030.29
	Other social services	0.00247067	0.00225206	0.0040231	0.000574739	0.000590716	0.00188939	0.00056567	0.00228312	0.00588281	0.000599083	0.0013052	0.00141193	0.00142675	0.00142591	81.4981	366.649	252.586	58.5397	57.0401	5.93442	0.16838	0.0226945	822.466
	Child care services	0.00245567	0.00220834	0.00407305	0.000476134	0.000492264	0.00185379	0.000485308	0.00230297	0.00566914	0.000503219	0.00108209	0.00116607	0.00134151	0.00118249	53.562	240.95	165.992	38.8413	37.4858	4.76031	0.132351	0.0176725	541.767
	Motion picture, radio, TV services	0.352882	0.352556	0.35494	0.350424	0.350446	0.352065	0.350423	0.352628	0.357	5.15023	12.9136	7.21891	0.351473	67.391	324.729	1285.46	958.606	269.402	257.735	9.6453	9.25235	110.041	3321.07
	News agency services	0.00146963	0.00163221	0.00171965	0.000190936	0.00019676	0.000936004	0.00015763	0.00141613	0.00333131	0.000162137	0.000636322	0.000669495	0.000536293	0.000715693	1.48596	6.62463	4.56695	1.0455	1.03359	0.0468819	0.0151329	0.0225066	14.8549
	Libraries, museums , art	0.00223311	0.00195772	0.00378911	0.000190137	0.000210098	0.00158163	0.000197487	0.00212766	0.00618764	0.000227425	0.000821558	0.000896747	0.00114199	0.000970411	161.856	728.294	501.717	113.308	113.293	0.0610581	0.0135499	0.0196576	1618.59
	Sport and recreation services	0.0103938	0.0123249	0.0117455	0.00123486	0.00119837	0.00483885	0.000981232	0.00871913	0.0143689	0.000964743	0.00340865	0.00338844	0.00272223	0.00383211	264.269	1188.86	819.008	185.011	184.95	0.253945	3.9406	0.110965	2646.48
	Other personal and other community services	0.0041127	0.00359009	0.0072101	0.000336159	4.57831	58.6112	71.4125	0.00378946	0.010594	75.1153	0.00146562	0.00160214	0.00199879	56.1039	440.451	1415.7	915.107	253.417	393.596	517.038	151.519	16.2381	4368.93
	Sewerage services	0.00513624	0.00444586	0.0100123	0.000403419	0.000443881	0.00353745	0.000436133	0.00478186	0.0130097	0.000481793	0.00174311	0.00191203	0.00242337	0.00204239	114.516	294.873	203.142	45.9081	45.8757	0.132352	0.0278167	0.0397583	704.565
	Waste disposal	0.00138237	0.00122341	0.00242948	0.000118055	0.000129107	0.000978906	0.000119444	0.00125398	0.0035396	7.59846	0.000521284	0.000577653	4.62809	19.4813	26.5906	125.804	99.9492	30.4836	18.6099	154.489	2.36034	1035.41	1525.42
	TOTAL	3179.06	2919.67	3929.46	4946.5	3257.59	4545.35	17182.4	5209.61	7461.84	23230.9	7159.71	6305.46	7981.43	6074.98	51916.8	121392	88569.8	52242.6	20844.4	146454	29708.3	13563.1	628074
																														Total Municipal solid waste food waste generation	Total commercial and industrial food waste generation	Total food waste generation
		Fresh and agricultural related food waste						Processed and consumption related food waste								Other Organic	Other waste												Tonnes	224167	103384	327551
		Apple and pear growing waste	Kiwifruit growing waste	Other fruit growing waste	Sheep and beef cattle farming waste	Dairy cattle farming waste	Fishing waste	Meat processing waste	Poultry processing waste	Bacon, ham and smallgood manufacturing waste	Dairy product manufacturing waste	Fruit and vegetable, oil and fat, cereal manufacturing waste	Bakery, sugar and confectionery manufacturing waste	Seafood processing waste	Other food manufacturing waste	Other Organic	Paper	Plastic	Metal	Glass	Construction and Demolition	Other	Potentially hazardous	Total waste	Total food waste				Per capita	0.0509123	0.0234803	0.0743927
	MSW	311.381	16.4718	572.585	0.0247737	0.00990597	0.0425217	16532.4	19676	41078.4	33938.2	34076.8	39888.8	15963.6	22112.2	100461	375206	278971	107615	75454	32008.5	52031.4	10235.1	1.25615e+06	224167
		Fresh and agricultural related food waste						Processed and consumption related food waste
	Value of food waste	Apple and pear growing waste	Kiwifruit growing waste	Other fruit growing waste	Sheep and beef cattle farming waste	Dairy cattle farming waste	Fishing waste	Meat processing waste	Poultry processing waste	Bacon, ham and smallgood manufacturing waste	Dairy product manufacturing waste	Fruit and vegetable, oil and fat, cereal manufacturing waste	Bakery, sugar and confectionery manufacturing waste	Seafood processing waste	Other food manufacturing waste	Total	Per capita
	MSW	247161	24180.7	1.33765e+06	54.6141	2.22942	171.901	3.55475e+07	2.18903e+07	6.97762e+07	7.63806e+06	4.74125e+07	2.7231e+07	6.58862e+07	1.51335e+07	2.92124e+08	66.3467
	C&I	2.52341e+06	4.28608e+06	9.17983e+06	1.09046e+07	733146	1.83753e+07	3.69452e+07	5.79589e+06	1.26748e+07	5.2283e+06	9.9616e+06	4.30456e+06	3.29415e+07	4.15769e+06	1.58012e+08	35.8873
	Total	2.77057e+06	4.31026e+06	1.05175e+07	1.09047e+07	733148	1.83755e+07	7.24927e+07	2.76862e+07	8.2451e+07	1.28664e+07	5.73741e+07	3.15356e+07	9.88277e+07	1.92912e+07	4.50136e+08	102.234
		Fresh and agricultural related food waste						Processed and consumption related food waste
	Water Total impact	Apple and pear growing waste	Kiwifruit growing waste	Other fruit growing waste	Sheep and beef cattle farming waste	Dairy cattle farming waste	Fishing waste	Meat processing waste	Poultry processing waste	Bacon, ham and smallgood manufacturing waste	Dairy product manufacturing waste	Fruit and vegetable, oil and fat, cereal manufacturing waste	Bakery, sugar and confectionery manufacturing waste	Seafood processing waste	Other food manufacturing waste	Total	Per capita
	MSW	1.16925e+06	118288	4.61846e+06	512.36	14.1211	1458.33	4.44351e+08	2.01939e+08	7.17051e+08	1.09204e+08	6.47129e+08	9.88122e+07	7.41759e+08	1.96888e+08	3.16304e+09	718.383
	C&I	1.19375e+07	2.09668e+07	3.1695e+07	1.02301e+08	4.64373e+06	1.55888e+08	4.61823e+08	5.34674e+07	1.30251e+08	7.47506e+07	1.35965e+08	1.56198e+07	3.70862e+08	5.40919e+07	1.62426e+09	368.899
	Total	1.31068e+07	2.10851e+07	3.63134e+07	1.02302e+08	4.64374e+06	1.55889e+08	9.06174e+08	2.55407e+08	8.47302e+08	1.83954e+08	7.83094e+08	1.14432e+08	1.11262e+09	2.5098e+08	4.7873e+09	1087.28
		Fresh and agricultural related food waste						Processed and consumption related food waste
	C02-E (Gg)	Apple and pear growing waste	Kiwifruit growing waste	Other fruit growing waste	Sheep and beef cattle farming waste	Dairy cattle farming waste	Fishing waste	Meat processing waste	Poultry processing waste	Bacon, ham and smallgood manufacturing waste	Dairy product manufacturing waste	Fruit and vegetable, oil and fat, cereal manufacturing waste	Bakery, sugar and confectionery manufacturing waste	Seafood processing waste	Other food manufacturing waste	Total	Per capita
	MSW	2.39296	0.147093	15.5308	0.00219284	6.16132e-05	0.000619444	722.147	145.905	509.337	114.751	304.643	146.665	277.023	108.645	2347.19	0.000533089
	C&I	24.431	26.0726	106.583	437.839	20.2615	66.2153	750.542	38.6312	92.5204	78.5478	64.007	23.1841	138.505	29.8486	1897.19	0.000430885
	Total	26.824	26.2197	122.114	437.841	20.2616	66.2159	1472.69	184.536	601.857	193.299	368.65	169.849	415.529	138.494	4244.38	0.000963974
		Fresh and agricultural related food waste						Processed and consumption related food waste
	C02-E (Tonnes)	Apple and pear growing waste	Kiwifruit growing waste	Other fruit growing waste	Sheep and beef cattle farming waste	Dairy cattle farming waste	Fishing waste	Meat processing waste	Poultry processing waste	Bacon, ham and smallgood manufacturing waste	Dairy product manufacturing waste	Fruit and vegetable, oil and fat, cereal manufacturing waste	Bakery, sugar and confectionery manufacturing waste	Seafood processing waste	Other food manufacturing waste	Total	Per capita
	MSW	2392.96	147.093	15530.8	2.19284	0.0616132	0.619444	722147	145905	509337	114751	304643	146665	277023	108645	2.34719e+06	0.533089
	C&I	24431	26072.6	106583	437839	20261.5	66215.3	750542	38631.2	92520.4	78547.8	64007	23184.1	138505	29848.6	1.89719e+06	0.430885
	Total	26824	26219.7	122114	437841	20261.6	66215.9	1.47269e+06	184536	601857	193299	368650	169849	415529	138494	4.24438e+06	0.963974
		Fresh and agricultural related food waste						Processed and consumption related food waste
	Energy (Tj)	Apple and pear growing waste	Kiwifruit growing waste	Other fruit growing waste	Sheep and beef cattle farming waste	Dairy cattle farming waste	Fishing waste	Meat processing waste	Poultry processing waste	Bacon, ham and smallgood manufacturing waste	Dairy product manufacturing waste	Fruit and vegetable, oil and fat, cereal manufacturing waste	Bakery, sugar and confectionery manufacturing waste	Seafood processing waste	Other food manufacturing waste	Total	Per capita
	MSW	12.8134	1.28868	81.5881	0.00245333	8.96703e-05	0.0108392	2372.55	1235.74	3891.97	455.958	3016.06	3365.81	3974.39	1081.5	19489.7	0.00442645
	C&I	130.819	228.421	559.912	489.85	29.4881	1158.66	2465.83	327.186	706.97	312.106	633.688	532.054	1987.1	297.125	9859.21	0.0022392
	Total	143.632	229.71	641.5	489.853	29.4882	1158.67	4838.38	1562.92	4598.94	768.064	3649.74	3897.87	5961.49	1378.63	29348.9	0.00666566

## Sheet: Value
Estimated values of waste (per tonne)
	Waste category	FAO categories used	US$ Price per tonne	Source
	Apple and pear growing waste	Average: Apples; Pears	793.76	FAO 2008, Dollar cost per tonne constant
	Kiwifruit growing waste	Kiwi fruit	1468	FAO 2008, Dollar cost per tonne constant
	Other fruit growing waste	Average: Bananas; Berries; Fruit, citrus; Fruit, tropical fresh; Grapefruit (inc. pomelos); Lemons and limes; Mangoes, mangosteens, guavas; Papayas; Peaches and nectarines; Pears; Persimmons; Pineapples; Plums and sloes; Raspberries	2336.15	FAO 2008, Dollar cost per tonne constant
	Sheep and beef cattle farming waste	Average: Meat live weight, cattle; Meat live weight, sheep	2204.52	FAO 2008, Dollar cost per tonne constant
	Dairy cattle farming waste	Milk, whole fresh cow	225.058	FAO 2008, Dollar cost per tonne constant
	Fishing waste	Export Total export value/Total export weight multiplied by Basic:Purchase price ratio, multipled by US:NZ exchange rate	4042.65	Seafood New Zealand [54]
	Meat processing waste	Average: Meat, cattle; Meat, pig; Meat, sheep	2150.18	FAO 2008, Dollar cost per tonne constant
	Poultry processing waste	Average Meat, chicken; Meat, duck; Meat, turkey	1112.54	FAO 2008, Dollar cost per tonne constant
	Bacon, ham and smallgood manufacturing waste	Meat, pig	1698.61	FAO 2008, Dollar cost per tonne constant
	Dairy product manufacturing waste	Milk, whole fresh cow	225.058	FAO 2008, Dollar cost per tonne constant
	Fruit and vegetable, oil and fat, cereal manufacturing waste	Average: Almonds, with shell; Anise, badian, fennel, coriander; Apples; Apricots; Asparagus; Avocados; Bananas; Barley; Beans, dry; Beans, green; Beeswax; Berries; Broad beans, horse beans, dry; Cabbages and other brassicas; Canary seed; Carrots and turnips; Cauliflowers and broccoli; Cherries; Chick peas; Chillies and peppers, green; Cucumbers and gherkins; Currants; Eggs, hen, in shell; Figs; F…	1391.34	FAO 2008, Dollar cost per tonne constant
	Bakery, sugar and confectionery manufacturing waste	Average: Bread – white sliced loaf; Biscuits – chocolate; Breakfast biscuits; Tomato sauce – canned; Chocolate – block; Potato crisps; Spaghetti – canned. This was then multiplied by the US:NZ exchange rate and the Basic:Purchase price ratio	682.672	Statistics New Zealand [56]
	Seafood processing waste	Export Total export value/Total export weight multiplied by the US:NZ exchange rate and the Basic:Purchase price ratio	4127.27	Seafood New Zealand [54]
	Other food manufacturing waste	Average: Bread – white sliced loaf; Biscuits – chocolate; Breakfast biscuits; Tomato sauce – canned; Chocolate – block; Potato crisps; Spaghetti – canned. This was then multiplied by the US:NZ exchange rate and the Basic:Purchase price ratio	684.395	Statistics New Zealand [56]

## Sheet: Calories
Estimate calories per tonned
Source: Wolfram Alpha.
		Apple and pear growing waste	Kiwifruit growing waste	Other fruit growing waste	Sheep and beef cattle farming waste	Dairy cattle farming waste	Fishing waste	Meat processing waste	Poultry processing waste	Bacon, ham and smallgood manufacturing waste	Dairy product manufacturing waste	Fruit and vegetable, oil and fat, cereal manufacturing waste	Bakery, sugar and confectionery manufacturing waste	Seafood processing waste	Other food manufacturing waste
	Calories per tonne	500000	610000	717000	1568000	617000	1430750	1710000	2231000	1710000	617000	3618100	3.78967e+06	1430600	3.33933e+06
	Foods search used in estimation	Average of Apples; Pears	Kiwi	Fruit (Average from Wolfram Alpha)	Average of Beef and Lamb	Milk	Average of Prawns (shrimp), fish, Shellfish	Sausage	Chicken	Sausage	Milk	Average of Butter; Vegetable(Average); Fruit (average); Oils; Rice; Flour; Pasta	Average of Pies, cakes, biscuits; Bread and bread rolls; and Confectionery	Average of Lobster; Prawns; Fish (wild); Shellfish; Fish (aquaculture)	Average of Breakfast cereals; Pasta; and Confectionary

## Sheet: Environmental Impacts
			Apple and pear growing waste	Kiwifruit growing waste	Other fruit growing waste	Sheep and beef cattle farming waste	Dairy cattle farming waste	Fishing waste	Meat processing waste	Poultry processing waste	Bacon, ham and smallgood manufacturing waste	Dairy product manufacturing waste	Fruit and vegetable, oil and fat, cereal manufacturing waste	Bakery, sugar and confectionery manufacturing waste	Seafood processing waste	Other food manufacturing waste
	Multipliers From EORA World MRIO NZ tables	Table m: Total Water (m3) total (domestic+upstream) emissions per unit of output for New Zealand in 2000	473.072	489.184	345.268	938.147	633.397	848.354	1250.02	922.506	1027.64	1429.73	1364.89	362.866	1125.82	1301.01
		Table m: Total CO2-e (Gg) total (domestic+upstream) emissions per unit of output for New Zealand in 2011	0.000968176	0.00060831	0.00116105	0.00401517	0.00276364	0.00036035	0.0020315	0.000666528	0.000729957	0.00150236	0.000642537	0.000538594	0.000420458	0.000717914
		Table m: Energy (by source- Total) (TJ) total (domestic+upstream) emissions per unit of output for New Zealand in 2011	0.0051842	0.00532937	0.00609938	0.00449213	0.00402214	0.00630553	0.0066743	0.00564513	0.00557778	0.00596955	0.00636131	0.0123602	0.0060322	0.00714641
		Converting costs to similar units (ie $'000)
			Apple and pear growing waste	Kiwifruit growing waste	Other fruit growing waste	Sheep and beef cattle farming waste	Dairy cattle farming waste	Fishing waste	Meat processing waste	Poultry processing waste	Bacon, ham and smallgood manufacturing waste	Dairy product manufacturing waste	Fruit and vegetable, oil and fat, cereal manufacturing waste	Bakery, sugar and confectionery manufacturing waste	Seafood processing waste	Other food manufacturing waste
	Converted cost (per$'000)	MSW	2471.61	241.807	12485.1	0.546141	0.0222942	1.71901	355475	218903	697762	76380.6	474125	272310	658862	151335
		C&I	25234.1	42860.8	85681	109046	7331.46	183753	369452	57958.9	126748	52283	99616	43045.6	329415	41576.9
		Total	27705.7	43102.6	98166.1	109047	7331.48	183755	724927	276862	824510	128664	573741	315356	988277	192912
			Apple and pear growing waste	Kiwifruit growing waste	Other fruit growing waste	Sheep and beef cattle farming waste	Dairy cattle farming waste	Fishing waste	Meat processing waste	Poultry processing waste	Bacon, ham and smallgood manufacturing waste	Dairy product manufacturing waste	Fruit and vegetable, oil and fat, cereal manufacturing waste	Bakery, sugar and confectionery manufacturing waste	Seafood processing waste	Other food manufacturing waste	Total
	Water Total impact	MSW	1.16925e+06	118288	4.31069e+06	512.36	14.1211	1458.33	4.44351e+08	2.01939e+08	7.17051e+08	1.09204e+08	6.47129e+08	9.88122e+07	7.41759e+08	1.96888e+08	3.16273e+09
		C&I	1.19375e+07	2.09668e+07	2.95829e+07	1.02301e+08	4.64373e+06	1.55888e+08	4.61823e+08	5.34674e+07	1.30251e+08	7.47506e+07	1.35965e+08	1.56198e+07	3.70862e+08	5.40919e+07	1.62215e+09
		Total	1.31068e+07	2.10851e+07	3.38936e+07	1.02302e+08	4.64374e+06	1.55889e+08	9.06174e+08	2.55407e+08	8.47302e+08	1.83954e+08	7.83094e+08	1.14432e+08	1.11262e+09	2.5098e+08	4.78488e+09
			Apple and pear growing waste	Kiwifruit growing waste	Other fruit growing waste	Sheep and beef cattle farming waste	Dairy cattle farming waste	Fishing waste	Meat processing waste	Poultry processing waste	Bacon, ham and smallgood manufacturing waste	Dairy product manufacturing waste	Fruit and vegetable, oil and fat, cereal manufacturing waste	Bakery, sugar and confectionery manufacturing waste	Seafood processing waste	Other food manufacturing waste	Total
	Total CO2-e Total Impact	MSW	2.39296	0.147093	14.4959	0.00219284	6.16132e-05	0.000619444	722.147	145.905	509.337	114.751	304.643	146.665	277.023	108.645	2346.16
		C&I	24.431	26.0726	99.4803	437.839	20.2615	66.2153	750.542	38.6312	92.5204	78.5478	64.007	23.1841	138.505	29.8486	1890.09
		Total	26.824	26.2197	113.976	437.841	20.2616	66.2159	1472.69	184.536	601.857	193.299	368.65	169.849	415.529	138.494	4236.24
			Apple and pear growing waste	Kiwifruit growing waste	Other fruit growing waste	Sheep and beef cattle farming waste	Dairy cattle farming waste	Fishing waste	Meat processing waste	Poultry processing waste	Bacon, ham and smallgood manufacturing waste	Dairy product manufacturing waste	Fruit and vegetable, oil and fat, cereal manufacturing waste	Bakery, sugar and confectionery manufacturing waste	Seafood processing waste	Other food manufacturing waste	Total
	Energy Total Impact	MSW	12.8134	1.28868	76.1512	0.00245333	8.96703e-05	0.0108392	2372.55	1235.74	3891.97	455.958	3016.06	3365.81	3974.39	1081.5	19484.2
		C&I	130.819	228.421	522.601	489.85	29.4881	1158.66	2465.83	327.186	706.97	312.106	633.688	532.054	1987.1	297.125	9821.9
		Total	143.632	229.71	598.752	489.853	29.4882	1158.67	4838.38	1562.92	4598.94	768.064	3649.74	3897.87	5961.49	1378.63	29306.1

## Sheet: Authorship details
	Title	New Zealand’s food waste: estimating the tonnes, value, calories and resources wasted
	Authors	Christian John Reynolds, Miranda Mirosa, and Brent Clothier
	Journal	Agriculture
